# Supplementary material
Source: Springer Nature journal article supplement (https://www.springermedizin.de/resource/supplementary/12957_2011_905_MOESM2_ESM.pdf/9565742)

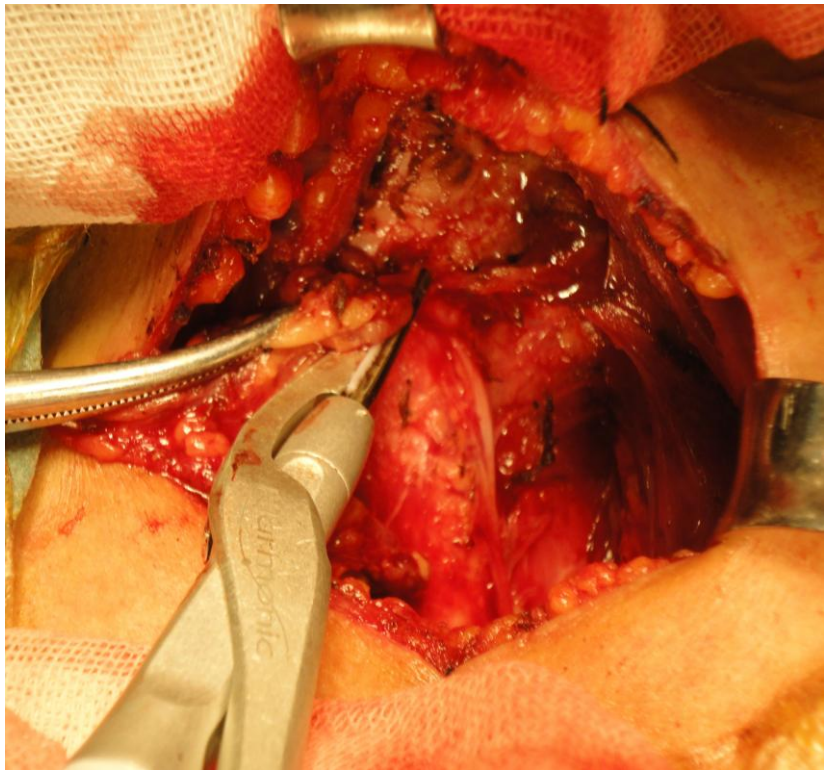

Supplement: MOESM2 [file 9565742]
